# Supplementary figures and images for: Effect of Starch Plasticization on Morphological, Mechanical, Crystalline, Thermal, and Optical Behavior of Poly(butylene adipate-co-terephthalate)/Thermoplastic Starch Composite Films
Source: MDPI journal article supplement (doi:10.3390/polym16030326), 2024-01-25

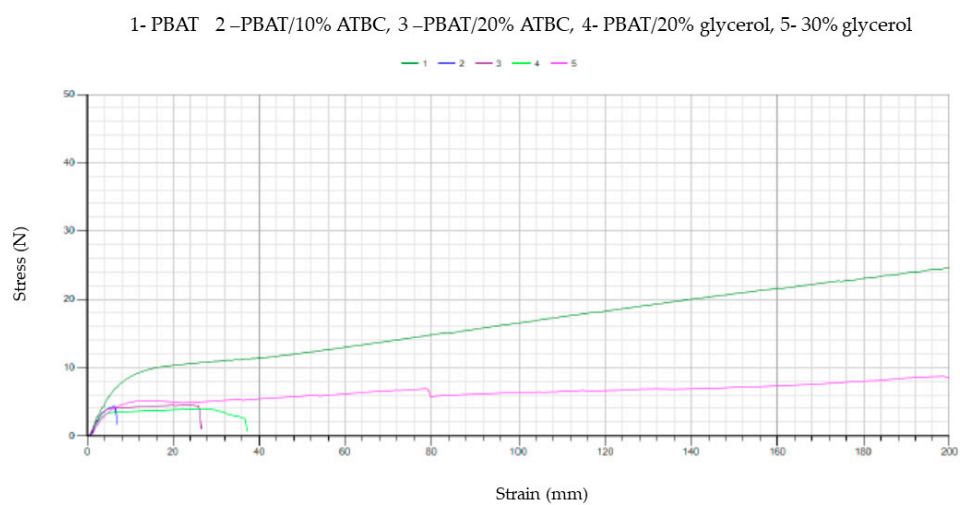

**Figure S1.** Stress and strain curves of PBAT/TPS composites after 48 months of storage.

Supplement: s1 [file s1]
